1 ***In vitro* efficacy of gentamicin against multidrug-resistant *Neisseria gonorrhoeae*:**  
2 **synergy of three gentamicin antimicrobial combinations**

3 Xuechun Li<sup>1</sup>, Wenjing Le<sup>1</sup>, Xiangdi Lou<sup>1</sup>, Biwei Wang<sup>1</sup>, Caroline A. Genco<sup>2</sup>, Peter A.  
4 Rice<sup>3</sup> and Xiaohong Su<sup>1#</sup>

5 <sup>1</sup>Institute of Dermatology, Chinese Academy of Medical Sciences and Peking Union  
6 Medical College, Nanjing, China

7 <sup>2</sup>Department of Immunology, School of Medicine, Tufts University, Boston, MA,  
8 USA.

9 <sup>3</sup>Division of Infectious Diseases and Immunology, Department of Medicine,  
10 University of Massachusetts Medical School, Worcester, MA, United States

11

12 Running Head: gentamicin against multidrug-resistant gonococci

13 #Corresponding author:

14 Xiaohong Su, MD, PhD.

15 Institute of Dermatology, Chinese Academy of Medical Sciences and Peking Union

16 Medical College,

17 No. 12, Jiangwangmiao Road,

18 Nanjing 210042, Jiangsu Province, China

19 Tel: (86) 25-85478090

20 Fax: (86) 25-85414477

21 Email: [suxh@ncstdlc.org](mailto:suxh@ncstdlc.org)

22

23 **ABSTRACT**

24 **Objectives:** To determine *in vitro* activities of gentamicin alone and in combination  
25 with ceftriaxone, ertapenem and azithromycin against multidrug-resistant (MDR) *N.*  
26 *gonorrhoeae* isolates.

27 **Methods:** 407 isolates from Nanjing, China, obtained in 2016 and 2017, had  
28 minimum inhibitory concentrations (MICs) determined for gentamicin using the agar  
29 dilution method. Antimicrobial combinations were also tested in 97 MDR strains  
30 using the antimicrobial gradient epsilometer test (Etest); results ranging from synergy  
31 to antagonism were interpreted using the fractional inhibitory concentration (FICI).

32 **Results:** All 407 gonococcal isolates were susceptible to gentamicin. MICs ranged  
33 from 2 mg/L to 16 mg/L. Synergy was demonstrated in 16.5% (16/97), 27.8% (27/97)  
34 and 8.2% (8/97) MDR strains when gentamicin was combined with ceftriaxone  
35 [geometric mean (GM) FICI; 0.747], ertapenem (GM FICI; 0.662) and azithromycin  
36 (GM FICI; 1.021), respectively. No antimicrobial antagonism was observed with any  
37 combination. The three antimicrobial combinations were indifferent overall. The  
38 overall GM MICs of gentamicin were reduced by 2.63-, 3.80- and 1.98-fold when  
39 tested in combination with ceftriaxone, ertapenem and azithromycin, respectively.  
40 The GM MICs of the three antimicrobials by themselves were reduced by 3-, 2.57-

41 and 1.98-fold respectively, when each was tested in combination with gentamicin. No  
42 antimicrobial antagonism was observed with any combination.

43 **Conclusions:** Gentamicin alone was effective *in vitro* against MDR *N. gonorrhoeae*  
44 and in combination with ceftriaxone, ertapenem or azithromycin. Combination testing  
45 of resistant strains, overall, showed lower effective MICs against gentamicin itself  
46 and each of the three antimicrobials when used in combination with gentamicin.

47 **Keywords:** *Neisseria gonorrhoeae*, multidrug resistance, combination, gentamicin

48

## 49 INTRODUCTION

50 Gonorrhea, caused by *Neisseria gonorrhoeae*, is a common bacterial sexually  
51 transmitted infection (STI), which is responsible for an increasing burden of disease  
52 globally. In 2016, the World Health Organization (WHO) estimated 87 million new  
53 cases of gonorrhea worldwide in adults, aged 15-49(1). Common features of  
54 gonococcal infection include urethritis and cervicitis; more serious manifestations  
55 include pelvic inflammatory disease, chronic pelvic pain, infertility, chorioamnionitis  
56 in women and epididymitis in men. Disseminated gonococcal infections (DGI) occurs  
57 occasionally in adults and neonates born to infected mothers; in the pre-antibiotic era  
58 endocarditis and meningitis sometimes resulted from gonococcal bacteremia but is  
59 rarely seen today. Concomitant gonococcal and HIV infections also increase the risk  
60 of HIV transmission (2).

61 The emergence of antibiotic resistance among *N. gonorrhoeae* is a global public  
62 health threat. *N. gonorrhoeae* has developed resistance to all antimicrobials that have  
63 been used for treatment, including penicillin, tetracycline, ciprofloxacin and  
64 azithromycin, leading to the emergence of multidrug-resistant (MDR) isolates, which  
65 are difficult to treat (3). Currently, dual antimicrobial therapy with an extended  
66 spectrum cephalosporin (ESC), either ceftriaxone 250 mg intramuscularly or cefixime  
67 400 mg orally, plus azithromycin 1 g orally, is recommended as first-line treatment of  
68 uncomplicated gonorrhea by the World Health Organization (WHO) (4). Increased  
69 prevalence of azithromycin resistance globally prompted a revision of prior  
70 recommendations in the United Kingdom (U.K.) (5) in 2018 and the United States  
71 (U.S.) (6) in 2020 from dual therapy with ceftriaxone and azithromycin to  
72 recommendations of higher doses of ceftriaxone: 1 gram (U.K.) and 500 mg (U.S.).  
73 Unfortunately, resistance to ESCs (7-9), the last remaining option for empirical  
74 first-line monotherapy, threatens future use of this class of antimicrobials. Treatment  
75 failures with both mono- and dual-therapy (including azithromycin) have been  
76 reported in recent years (10, 11).  
77 Treatment options for gonorrhea including infections caused by MDR organisms are  
78 diminishing; there is an urgent need to explore new or repurposed antimicrobial  
79 agents and/or therapeutic strategies. Gentamicin, an aminoglycoside antibiotic that  
80 inhibits protein synthesis by binding to the 30S ribosomal subunit, has been used as  
81 first-line therapy for treatment of gonorrhea in several countries, including Malawi,

82 where it has been used officially for nearly 30 years (12). Numerous *in vitro*  
83 susceptibility studies have shown that gentamicin is active against *N. gonorrhoeae*  
84 (13-16), suggesting that gentamicin is appropriate for treatment of uncomplicated  
85 gonococcal infection. A single 240 mg dose of intramuscular gentamicin was 95%  
86 efficacious in a randomized controlled clinical trial to treat urethritis (17). In  
87 multicenter clinical trials, dual therapy with gentamicin plus azithromycin was  
88 94%-100% effective compared to 98% for ceftriaxone plus azithromycin (18, 19).  
89 Little is known about *in vitro* susceptibility of gentamicin in Chinese isolates where  
90 this antimicrobial has not been used to treat gonorrhea. Use of antimicrobial  
91 combinations is a therapeutic strategy intended to increase efficacy and slow the  
92 development of resistance (20). Antimicrobial combinations may prove useful to  
93 successfully manage MDR *N. gonorrhoeae* infections and they are included in current  
94 WHO and CDC guidelines (4, 6).  
95 Initially, we evaluated gentamicin susceptibility of gonococcal strains isolated  
96 between 2016 and 2017 in Nanjing, China. Second, we carried out studies with  
97 antimicrobial combinations that included gentamicin to evaluate possible *in vitro*  
98 enhancement of gentamicin activity against MDR strains when tested in combination  
99 with either ceftriaxone (an ESC), ertapenem (a carbapenem) or azithromycin (a  
100 macrolide). Third, we determined the MICs of each of the three antimicrobials by  
101 themselves when tested in combination with gentamicin.

102

103 **RESULTS**

104 All 407 *N. gonorrhoeae* strains were sensitive to gentamicin by agar dilution; minimum  
105 inhibitory concentrations (MICs) ranged from 2mg/L to 16mg/L; the MIC<sub>50</sub> was 8  
106 mg/L and the MIC<sub>90</sub> was 16mg/L. Among the 407 isolates, 34 (8.4%) were susceptible  
107 (MIC ≤ 4mg/L), 373 (91.6%) were intermediately susceptible (MIC range, 8-16 mg/L)  
108 and none was resistant (MIC ≥ 32 mg/L) (Fig.1). Among the 34 fully susceptible  
109 isolates, 6 (17.6%) had decreased susceptibility to ESCs i.e. ceftriaxone or cefixime or  
110 both and 1 (2.9%) was fully resistant to ceftriaxone (MIC; 1mg/L) and cefixime (MIC;  
111 2mg/L). There was no change in intermediate susceptibility to gentamicin of isolates  
112 between 2016 and 2017 (89.3% vs. 93.4%;  $\chi^2=2.225$ , P=0.136) (Fig. 2).

113 The distribution of antimicrobial susceptibility patterns for the 97 MDR strains selected  
114 for antimicrobial combination testing showed 6 unique patterns of susceptibility (Table  
115 S1). 93 (95.9%) strains had decreased susceptibility to ceftriaxone or cefixime or both  
116 plus resistance to ciprofloxacin and penicillin, and 4 (4.1%) strains had decreased  
117 susceptibility to ceftriaxone or cefixime or both plus resistance to ciprofloxacin,  
118 penicillin and azithromycin. Resistance to gentamicin in MDR isolates was not  
119 detected by either the agar dilution or the Etest method. Agreement of MICs between  
120 agar dilution and Etest among MDR isolates is summarized in Table S2. Overall  
121 agreement of MICs (≤ 2-fold different) between the two methods was 93.8%. Etest  
122 always resulted in one to two dilutions lower MIC values than agar dilution.

123 Gentamicin agar dilution versus Etest MIC results (mg/L) were as follows: MIC<sub>50</sub> = 8

124 versus 6; MIC<sub>90</sub> =16 versus 8; geometric mean [GM] MIC =11.3 versus 5.84.

125 Additionally, there was a discrepancy in the full susceptibility category (29.9% fully  
126 susceptible by Etest versus 9.3% by agar dilution;  $\chi^2=13.090$ ,  $P<0.001$ ).

127 The three antimicrobial combinations used to test each of the 97 strains were examined  
128 for effects that were classified as: synergistic, indifferent or antagonistic-- summarized  
129 in Table 1. For example, the gentamicin GM MIC, when tested alone, was 5.840 mg/L;  
130 when combined with ceftriaxone, the GM MIC was reduced to 2.217 mg/L (2.63-fold  
131 reduction,  $P <0.001$ ) (Table 2). Together with ceftriaxone, gentamicin exhibited  
132 synergy against 16.5% (16/97) MDR strains; overall, the combination was indifferent;  
133 FICI, 0.747. When tested alone, MICs of ceftriaxone ranged from 0.016-0.75 mg/L; in  
134 combination with gentamicin, the GM MIC against ceftriaxone decreased from 0.078  
135 to 0.026 mg/L (3-fold reduction,  $P <0.001$ ).

136 The gentamicin GM MIC when combined with ertapenem decreased to 1.536 mg/L  
137 (3.80-fold reduction,  $P <0.001$ ) (Table 2). Gentamicin together with ertapenem was  
138 the most synergistic combination, displaying synergy against 27.8% (27/97) of MDR  
139 gonococcal isolates; overall, this combination was indifferent; FICI, 0.662. Ertapenem  
140 MICs of 97 MDR isolates, when tested alone, ranged from 0.006 to 0.064 mg/L (GM  
141 MIC, 0.018 mg/L); when combined with gentamicin, the GM MIC decreased to 0.007  
142 mg/L (2.57-fold reduction,  $P <0.001$ ).

143 The gentamicin GM MIC when combined with azithromycin decreased to 2.949 mg/L  
144 (1.98-fold reduction,  $P <0.001$ ) (Table 2). Together with azithromycin, gentamicin

145 exhibited synergy against 8.2% (8/97) MDR strains; overall, the combination was  
146 indifferent; FICI, 1.021. When tested alone, MICs of azithromycin ranged from  
147 0.047-8 mg/L; in combination with gentamicin, the GM MIC against azithromycin  
148 decreased from 0.347 to 0.175 mg/L (1.98-fold reduction,  $P < 0.001$ ).

149

## 150 **DISCUSSION**

151 Our study provides data on gentamicin susceptibility against *N. gonorrhoeae* isolated  
152 in Nanjing (Jiangsu Province), China. On agar dilution testing, most strains displayed  
153 intermediate susceptibility to gentamicin (MIC 8-16 mg/L), similar to a study that  
154 examined gonococcal isolates from seven hospitals in a neighboring eastern Chinese  
155 province; in that study 97.8% (493/504) of strains possessed gentamicin MICs of 8-16  
156 mg/L (21). European and U.S. studies have reported 82.7% (15) and 73% (18),  
157 intermediate susceptibility, respectively, of *N. gonorrhoeae* isolates to gentamicin.  
158 A recent report of gentamicin susceptibility of *N. gonorrhoeae* in which 86.0% of 470  
159 isolates were fully susceptible (MICs  $\leq 4$  mg/L), examined isolates from seven  
160 geographically distributed Chinese provinces as part of the China Gonococcal  
161 Resistance Surveillance Programme (China-GRSP) (22) similar to an Indian study  
162 where 90.7% of isolates were reported as fully susceptible (15).

163 Our study compared gentamicin MICs using agar dilution and Etest methods for 97  
164 multidrug-resistant (MDR) *N. gonorrhoeae* isolates. Similar to previous studies (13,  
165 23), we found that over 90% of gentamicin MICs determined by agar dilution and



166 Etest were  $\leq 2$ -fold different; typically, Etest resulted in lower MICs and identified a  
167 larger proportion of fully susceptible isolates. In particular, all MDR isolates were  
168 fully or intermediately susceptible to gentamicin.

169 Synergistic or additive effects of combining antimicrobials for treatment may slow the  
170 development of antimicrobial resistance of *N. gonorrhoeae* (24). We assessed the *in*  
171 *vitro* activity of gentamicin in combination with 3 antibiotics. Determining synergy  
172 has several challenges. Several test methods are available to evaluate synergistic  
173 effects of antimicrobial combinations, however, they are not well standardized. We  
174 chose Etest because it is practical and also correlates well with agar dilution, time–kill  
175 curves and checkerboard testing in demonstrating synergy for two-drug combination  
176 (25-27). Nonetheless, FICI interpretation depends on the criteria used. FICI values  
177 between 0.5 and 1 have been interpreted as additive in Indian (28) and Japanese (29)  
178 studies, differing from our criteria, which classifies FICI values in this range as  
179 indifferent.

180 Ceftriaxone, in higher doses, is now recommended as single therapy by the U.S. and  
181 the U.K. for treatment of uncomplicated gonorrhea (5, 6). Our study showed that the  
182 combination of ceftriaxone and gentamicin exhibited an indifferent effect overall in  
183  $>80\%$  of MDR strains ( $< 20\%$  synergy). In the Indian study by Singh *et al* (28), 14.7%  
184 synergy and 6.3% antagonism were reported for this combination against 95 *N.*  
185 *gonorrhoeae* strains including 79 MDR and one extensively drug-resistant (XDR)  
186 strain. In a Canadian study, a mean FICI<sub>50</sub> value of 1.2 (0.8-2.0) was shown for nine

187 reference strains of *N. gonorrhoeae* (WHO F, G, K, L, M, N, O, P and ATCC 49226)  
188 with this combination (30). An American study reported a mean FICI of 1.25 (0.73-2)  
189 using gonococcal isolates that displayed different cefixime MICs (26). No  
190 synergistic/antagonistic effect (resulting in 100% indifference) was observed in either  
191 study (26, 30).

192 We chose ertapenem as a candidate for *in vitro* synergy testing because its mechanism  
193 of action differs from that of gentamicin and it has been used to treat infection with  
194 combined high-level azithromycin and ceftriaxone resistant *N. gonorrhoeae* (11).  
195 Ertapenem has demonstrated an advantage over ceftriaxone for MDR or ceftriaxone  
196 resistant isolates and has also been suggested for possible use in a dual antimicrobial  
197 regimen (31). We showed that gentamicin plus ertapenem in combination resulted in  
198 synergistic and indifferent effects with no antagonism demonstrated in any MDR  
199 strain. In the study by Singh *et al* (28), this combination displayed either synergy  
200 (31.6%) or indifference (68.4%) in 100% of strains; no antagonism was seen.

201 Gentamicin in combination with azithromycin is currently recommended as an option  
202 for retreatment by the WHO when dual therapy fails (4). Also, it is proposed as an  
203 alternative CDC recommendation when higher dose ceftriaxone therapy cannot be used  
204 (6). In our studies, this combination demonstrated synergy in fewer MDR isolates  
205 (<10%) than combinations with either ceftriaxone or ertapenem and exhibited the  
206 highest FICI value of the three combinations tested. Similar to our results, Sood *et al*  
207 (32) demonstrated synergistic effects in 22.9% of isolates displaying different

208 ceftriaxone MICs and no antagonism for this combination. All isolates with differing  
209 cefixime/ ceftriaxone MICs showed indifference with a mean FICI of 1.7/0.83 in  
210 studies from the UK (33) and Japan (29). The separate study by Singh *et al* (28) differed  
211 from these results, with 6.3% of strains exhibiting antagonism when this combination  
212 was used.

213 A summary of results from these previous studies is shown in Table S3. No  
214 synergistic/antagonistic effect (resulting in 100% indifference) was observed in studies  
215 from Canada (30), Japan (29), the US (26) and the UK (33). None of these studies  
216 incorporated isolates with multi-drug resistance. However, a certain proportion of  
217 synergistic effects was observed in the two Indian studies (28, 32). Antagonism was  
218 also observed in combinations of gentamicin with ceftriaxone and azithromycin in the  
219 study by Singh *et al* (28). Sood *et al* (32) used the same Etest that we used. In contrast,  
220 Singh *et al* (28) incubated the Etest strip of the first antimicrobial (antimicrobial A)  
221 for 1 h, and then replaced it with the Etest strip of the second antimicrobial  
222 (antimicrobial B) at the same location and looked for synergism. A mild degree of  
223 antagonism may have been missed in our tests when the zone of inhibition ran under the  
224 strips where they crossed and therefore was unreadable and interpreted as indifference  
225 (25).

226 From a pharmacokinetic perspective, all antimicrobials in the 3 combinations in our  
227 study result in peak levels of drug during the first 3 hours after administration (34-37).  
228 However, azithromycin has a longer half-life than gentamicin (approximately 68 and

229 2 hours, respectively) (34, 37). Gentamicin in combination with azithromycin also  
230 produced the lowest synergistic effects among the 3 combinations in our study so it  
231 may not be optimal for clinical use where synergy would not be prolonged.  
232 In conclusion, resistance to gentamicin was not observed in gonococcal isolates  
233 examined in this study, including MDR isolates, indicating potential for its  
234 therapeutic use. Antimicrobial combinations of gentamicin plus ertapenem,  
235 ceftriaxone, and azithromycin showed no antagonistic effects; enhanced efficacy of  
236 individual antimicrobials in the presence of other antimicrobials was also  
237 demonstrated. Improved efficacy of antimicrobial combinations suggest that dual  
238 therapy might be a promising approach to manage MDR *N. gonorrhoeae*. Further  
239 studies to correlate *in vitro* results with clinical outcomes are warranted.

240

## 241 **MATERIALS AND METHODS**

242 **Bacterial strains** 407 gonococcal isolates were recovered from men with  
243 symptomatic urethritis (urethral discharge and/or dysuria) attending the STD clinic at  
244 the Institute of Dermatology, Chinese Academy of Medical Sciences in Nanjing,  
245 between January 2016 and December 2017. Urethral specimens were collected with  
246 cotton swabs and immediately streaked onto modified Thayer-Martin medium  
247 (Zhuhai DL Biotech Co. Ltd.) and cultured in candle jars at 36°C for 24–48 h.  
248 Gonococcal isolates were identified by colonial morphology, Gram's stain, and  
249 oxidase testing and sub-cultured onto GC chocolate agar base (Difco, Detroit, MI)

250 supplemented with 1% IsovitaleX™ (Oxoid, USA); pure cultures were swabbed,  
251 suspended in tryptone-based soy broth and frozen (−80°C) until used for antimicrobial  
252 testing.

253 **Antimicrobial susceptibility testing** The MICs of the 407 isolates were determined  
254 using the agar dilution method for gentamicin, penicillin, tetracycline, ciprofloxacin,  
255 azithromycin, spectinomycin, cefixime and ceftriaxone, used singly, according to the  
256 Clinical and Laboratory Standards Institute (CLSI) guidelines (38). *N. gonorrhoeae*  
257 ATCC 49226, WHO reference strains F, G, L, O and P were used as quality control  
258 strains in susceptibility tests. Although formal susceptibility criteria for gentamicin  
259 have not been established by CLSI, criteria described by CDC (16) have used MICs  
260 of ≤4 mg/L as fully susceptible, 8 to 16 mg/L as intermediately susceptible and ≥32  
261 mg/L as resistant. Resistance to azithromycin (MIC ≥1 mg/L) was determined using  
262 EUCAST criteria (39). Susceptibilities to other antibiotics were assessed based on  
263 CLSI standards (38). Decreased susceptibility to cephalosporins was determined  
264 according to WHO standards (40). Based on criteria proposed by Tapsall *et al* in 2009  
265 (41), MDR isolates were defined as those resistant or with decreased susceptibility to  
266 one or more widely used antimicrobials (ceftriaxone and cefixime; category I) and  
267 resistant to two or more antimicrobials, which are used less frequently (penicillin;  
268 ciprofloxacin and azithromycin; category II) (Table S4).

269 **Synergy testing and interpretation** Of 407 clinical isolates of *N. gonorrhoeae*, 97  
270 MDR isolates (determined below) were selected for antimicrobial combination testing

271 (synergy/ antagonism) according to MDR criteria. WHO-P was used as a quality  
272 control strain. Dual antimicrobial testing was performed to evaluate the efficacy of  
273 gentamicin in combination with either ceftriaxone, ertapenem or azithromycin, using  
274 the Etest method, described previously (25). Briefly, MICs for individual  
275 antimicrobials (MIC A<sub>alone</sub> and MIC B<sub>alone</sub>) against *Neisseria gonorrhoeae* isolates  
276 were determined using Etest strips (Liofilchem, Italy); *in vitro* activity of each  
277 combination was determined by placing E-test strips of the two antimicrobials on the  
278 agar plates at a 90° angle, with intersections at the points of their individual MICs  
279 (Fig. 3). Agar plates were inverted during incubation at 36°C in 5% CO<sub>2</sub> for 16–18  
280 hours, and the MIC of each antimicrobial in the combination (MIC A<sub>in combination</sub> and  
281 MIC B<sub>in combination</sub>) was read.

282 To determine whether each antimicrobial combination resulted in a synergistic,  
283 indifferent or antagonistic effect, the fractional inhibitory concentration index (FICI)  
284 was calculated using the following formula:  $FICI = (MIC A_{in\ combination} / MIC A_{alone})$   
285  $+ (MIC B_{in\ combination} / MIC B_{alone})$  (25). FICI values were interpreted using the  
286 following criteria: synergy:  $\leq 0.5$ ; indifference:  $FICI > 0.5$  to  $\leq 4.0$  and antagonism: FICI  
287 of  $> 4.0$  (25).

288 **Statistical Analysis** The chi-square test was used to compare gentamicin  
289 susceptibility trend data and the categorical assignments of gentamicin susceptibility by  
290 the agar dilution or Etest method. Mean values of MICs and FICIs were calculated as  
291 geometric means (GM). The statistical significance of the difference between the MIC

292 of each of the three antimicrobials tested alone and in combination with gentamicin  
293 was determined using the nonparametric Mann-Whitney's U-test. P values less than  
294 0.05 were considered statistically significant.

295

## 296 **ACKNOWLEDGEMENTS**

297 This work was supported by the grants from the Chinese Academy of Medical  
298 Sciences Initiative for Innovative Medicine (2016-I2M-3-021) and the U.S. National  
299 Institutes of Health ( AI084048 and AI116969).

300

## 301 **CONFLICTS OF INTEREST**

302 No conflicts for all authors.

303

## 304 **REFERENCES**

- 305 1. World Health Organization. Report on global sexually transmitted infection  
306 surveillance -2018[M]. World Health Organization, 2018; Available from:  
307 <https://www.who.int/publications/i/item/9789241565691>.
- 308 2. Mlisana, K., N. Naicker, L. Werner, L. Roberts, F. van Loggerenberg, C. Baxter,  
309 J. A. Passmore, A. C. Grobler, A. W. Sturm, C. Williamson, K. Ronacher, G. Walzl,  
310 and K. S. Abdool. 2012. Symptomatic vaginal discharge is a poor predictor of  
311 sexually transmitted infections and genital tract inflammation in high-risk women in  
312 South Africa. *J Infect Dis* 206:6-14.

- 313 3. Unemo, M., C. S. Bradshaw, J. S. Hocking, H. de Vries, S. C. Francis, D. Mabey,  
314 J. M. Marrazzo, G. Sonder, J. R. Schwebke, E. Hoornenborg, R. W. Peeling, S. S.  
315 Philip, N. Low, and C. K. Fairley. 2017. Sexually transmitted infections: challenges  
316 ahead. *Lancet Infect Dis* 17:e235-e279.
- 317 4. World Health Organization (WHO). 2016. WHO guidelines for the treatment of  
318 *Neisseria gonorrhoeae*. WHO: Geneva, Switzerland, 2016; Available from:  
319 [https://www.who.int/reproductivehealth/publications/rtis/gonorrhoea-treatment-guidel](https://www.who.int/reproductivehealth/publications/rtis/gonorrhoea-treatment-guidelines/en/)  
320 [ines/en/](https://www.who.int/reproductivehealth/publications/rtis/gonorrhoea-treatment-guidelines/en/).
- 321 5. Fifer, H., J. Saunders, S. Soni, S. T. Sadiq, and M. FitzGerald. 2020. 2018 UK  
322 national guideline for the management of infection with *Neisseria gonorrhoeae*. *Int J*  
323 *STD AIDS* 31:4-15.
- 324 6. St, C. S., L. Barbee, K. A. Workowski, L. H. Bachmann, C. Pham, K. Schlanger,  
325 E. Torrone, H. Weinstock, E. N. Kersh, and P. Thorpe. 2020. Update to CDC's  
326 Treatment Guidelines for Gonococcal Infection, 2020. *MMWR Morb Mortal Wkly*  
327 *Rep* 69:1911-1916.
- 328 7. Ohnishi, M., D. Golparian, K. Shimuta, T. Saika, S. Hoshina, K. Iwasaku, S.  
329 Nakayama, J. Kitawaki, and M. Unemo. 2011. Is *Neisseria gonorrhoeae* initiating a  
330 future era of untreatable gonorrhea?: detailed characterization of the first strain with  
331 high-level resistance to ceftriaxone. *Antimicrob Agents Chemother* 55:3538-45.
- 332 8. Camara, J., J. Serra, J. Ayats, T. Bastida, D. Carnicer-Pont, A. Andreu, and C.  
333 Ardanuy. 2012. Molecular characterization of two high-level ceftriaxone-resistant



- 334 *Neisseria gonorrhoeae* isolates detected in Catalonia, Spain. *J Antimicrob Chemother*  
335 67:1858-60.
- 336 9. Unemo, M., D. Golparian, R. Nicholas, M. Ohnishi, A. Gallay, and P. Sednaoui.  
337 2012. High-level cefixime- and ceftriaxone-resistant *Neisseria gonorrhoeae* in  
338 France: novel penA mosaic allele in a successful international clone causes treatment  
339 failure. *Antimicrob Agents Chemother* 56:1273-80.
- 340 10. Fifer, H., U. Natarajan, L. Jones, S. Alexander, G. Hughes, D. Golparian, and M.  
341 Unemo. 2016. Failure of Dual Antimicrobial Therapy in Treatment of Gonorrhoea. *N*  
342 *Engl J Med* 374:2504-6.
- 343 11. Eyre, D. W., N. D. Sanderson, E. Lord, N. Regisford-Reimmer, K. Chau, L.  
344 Barker, M. Morgan, R. Newnham, D. Golparian, M. Unemo, D. W. Crook, T. E. Peto,  
345 G. Hughes, M. J. Cole, H. Fifer, A. Edwards, and M. I. Andersson. 2018. Gonorrhoea  
346 treatment failure caused by a *Neisseria gonorrhoeae* strain with combined ceftriaxone  
347 and high-level azithromycin resistance, England, February 2018. *Euro Surveill* 23.
- 348 12. Ross, J. D., and D. A. Lewis. 2012. Cephalosporin resistant *Neisseria*  
349 *gonorrhoeae*: time to consider gentamicin? *Sex Transm Infect* 88:6-8.
- 350 13. Chisholm, S. A., N. Quaye, M. J. Cole, H. Fredlund, S. Hoffmann, J. S. Jensen,  
351 M. J. van de Laar, M. Unemo, and C. A. Ison. 2011. An evaluation of gentamicin  
352 susceptibility of *Neisseria gonorrhoeae* isolates in Europe. *J Antimicrob Chemother*  
353 66:592-595.
- 354 14. Lagace-Wiens, P., H. J. Adam, N. M. Laing, M. R. Baxter, I. Martin, M. R.

- 355 Mulvey, J. A. Karlowky, D. J. Hoban, and G. G. Zhanel. 2017. Antimicrobial  
356 susceptibility of clinical isolates of *Neisseria gonorrhoeae* to alternative  
357 antimicrobials with therapeutic potential. *J Antimicrob Chemother* 72:2273-2277.
- 358 15. Bala, M., V. Singh, A. Bhargava, M. Kakran, N. C. Joshi, and R. Bhatnagar.  
359 2016. Gentamicin Susceptibility among a Sample of Multidrug-Resistant *Neisseria*  
360 *gonorrhoeae* Isolates in India. *Antimicrob Agents Chemother* 60:7518-7521.
- 361 16. Mann, L. M., R. D. Kirkcaldy, J. R. Papp, and E. A. Torrone. 2018. Susceptibility  
362 of *Neisseria gonorrhoeae* to Gentamicin—Gonococcal Isolate Surveillance Project,  
363 2015-2016. *Sex Trans Dis* 45:96-98.
- 364 17. Lule, G., F. M. Behets, I. F. Hoffman, G. Dallabetta, H. A. Hamilton, S. Moeng,  
365 G. Liomba, and M. S. Cohen. 1994. STD/HIV control in Malawi and the search for  
366 affordable and effective urethritis therapy: a first field evaluation. *Genitourin Med*  
367 70:384-388.
- 368 18. Kirkcaldy, R. D., H. S. Weinstock, P. C. Moore, S. S. Philip, H. C. Wiesenfeld, J.  
369 R. Papp, P. R. Kerndt, S. Johnson, K. G. Ghanem, E. W. Hook, L. M. Newman, D.  
370 Dowell, C. Deal, J. Glock, L. Venkatasubramanian, L. McNeil, C. Perlowski, J. Y.  
371 Lee, S. Lensing, N. Trainor, S. Fuller, A. Herrera, J. S. Carlson, H. Harbison, C.  
372 Lenderman, P. Dixon, A. Whittington, I. Macio, C. Priest, A. Jett, T. Campbell, A.  
373 Uniyal, L. Royal, M. Mejia, J. Vonghack, S. Tobias, J. Zenilman, J. Long, A. Harvey,  
374 K. Pettus, and S. Sharpe. 2014. The Efficacy and Safety of Gentamicin Plus  
375 Azithromycin and Gemifloxacin Plus Azithromycin as Treatment of Uncomplicated

- 376 Gonorrhea. *Clin Infect Dis* 59:1083-1091.
- 377 19. Ross, J. D., J. Harding, L. Duley, A. A. Montgomery, T. Hepburn, W. Tan, C.  
378 Brittain, G. Meakin, K. Sprange, S. Thandi, L. Jackson, T. Roberts, J. Wilson, J.  
379 White, C. Dewsnap, M. Cole, and T. Lawrence. 2019. Gentamicin as an alternative to  
380 ceftriaxone in the treatment of gonorrhoea: the G-TOG non-inferiority RCT. *Health*  
381 *Technol Assess* 23:1-104.
- 382 20. Bollenbach, T. 2015. Antimicrobial interactions: mechanisms and implications  
383 for drug discovery and resistance evolution. *Curr Opin Microbiol* 27:1-9.
- 384 21. Yang, F., J. Yan, J. Zhang, and S. van der Veen. 2020. Evaluation of alternative  
385 antibiotics for susceptibility of gonococcal isolates from China. *Int J Antimicrob*  
386 *Agents* 55:105846.
- 387 22. Liu, J. W., W. Q. Xu, X. Y. Zhu, X. Q. Dai, S. C. Chen, Y. Han, J. Liu, X. S.  
388 Chen, and Y. P. Yin. 2019. Gentamicin susceptibility of *Neisseria gonorrhoeae*  
389 isolates from 7 provinces in China. *Infect Drug Resist* 12:2471-2476.
- 390 23. Daly, C. C., I. Hoffman, M. Hobbs, M. Maida, D. Zimba, R. Davis, G.  
391 Mughogho, and M. S. Cohen. 1997. Development of an antimicrobial susceptibility  
392 surveillance system for *Neisseria gonorrhoeae* in Malawi: comparison of methods. *J*  
393 *Clin Microbiol* 35:2985-8.
- 394 24. Lee, H., K. Lee, and Y. Chong. 2016. New treatment options for infections  
395 caused by increasingly antimicrobial-resistant *Neisseria gonorrhoeae*. *Expert Rev*  
396 *Anti Infect Ther* 14:243.

- 397 25. White, R. L., D. S. Burgess, M. Manduru, and J. A. Bosso. 1996. Comparison of  
398 three different in vitro methods of detecting synergy: time-kill, checkerboard, and E  
399 test. *Antimicrob Agents Chemother* 40:1914-8.
- 400 26. Barbee, L. A., O. O. Soge, K. K. Holmes, and M. R. Golden. 2014. In vitro  
401 synergy testing of novel antimicrobial combination therapies against *Neisseria*  
402 *gonorrhoeae*. *J Antimicrob Chemother* 69:1572-1578.
- 403 27. Wind, C. M., H. J. de Vries, and A. P. van Dam. 2015. Determination of in vitro  
404 synergy for dual antimicrobial therapy against resistant *Neisseria gonorrhoeae* using  
405 Etest and agar dilution. *Int J Antimicrob Agents* 45:305-8.
- 406 28. Singh, V., M. Bala, A. Bhargava, M. Kakran, and R. Bhatnagar. 2018. In vitro  
407 efficacy of 21 dual antimicrobial combinations comprising novel and currently  
408 recommended combinations for treatment of drug resistant gonorrhoea in future era.  
409 *PLoS One* 13:e0193678.
- 410 29. Furuya, R., Y. Koga, S. Irie, M. Tanaka, F. Ikeda, A. Kanayama, and I.  
411 Kobayashi. 2013. In vitro activities of antimicrobial combinations against clinical  
412 isolates of *Neisseria gonorrhoeae*. *J Infect Chemother* 19:1218-1220.
- 413 30. Bharat, A., I. Martin, G. G. Zhanel, and M. R. Mulvey. 2016. In vitro potency and  
414 combination testing of antimicrobial agents against *Neisseria gonorrhoeae*. *J Infect*  
415 *Chemother* 22:194-7.
- 416 31. Unemo, M., D. Golparian, A. Limnios, D. Whiley, M. Ohnishi, M. M. Lahra, and  
417 J. W. Tapsall. 2012. In vitro activity of ertapenem versus ceftriaxone against

- 418 *Neisseria gonorrhoeae* isolates with highly diverse ceftriaxone MIC values and  
419 effects of ceftriaxone resistance determinants: ertapenem for treatment of gonorrhea?  
420 Antimicrob Agents Chemother 56:3603-9.
- 421 32. Sood, S., S. K. Agarwal, R. Singh, S. Gupta, and V. K. Sharma. 2019. In vitro  
422 assessment of gentamicin and azithromycin-based combination therapy against  
423 *Neisseria gonorrhoeae* isolates in India. J Med Microbiol 68:555-559.
- 424 33. Pereira, R., M. J. Cole, and C. A. Ison. 2013. Combination therapy for  
425 gonorrhoea: in vitro synergy testing. J Antimicrob Chemother 68:640-643.
- 426 34. Siber, G. R., P. Echeverria, A. L. Smith, J. W. Paisley, and D. H. Smith. 1975.  
427 Pharmacokinetics of gentamicin in children and adults. J Infect Dis 132:637-51.
- 428 35. Richards, D. M., R. C. Heel, R. N. Brogden, T. M. Speight, and G. S. Avery.  
429 1984. Ceftriaxone. A review of its antibacterial activity, pharmacological properties  
430 and therapeutic use. Drugs 27:469-527.
- 431 36. Nix, D. E., A. K. Majumdar, and M. J. DiNubile. 2004. Pharmacokinetics and  
432 pharmacodynamics of ertapenem: an overview for clinicians. J Antimicrob  
433 Chemother 53 Suppl 2:ii23-8.
- 434 37. Crokaert, F., A. Hubloux, and P. Cauchie. 1998. A Phase I Determination of  
435 Azithromycin in Plasma during a 6-Week Period in Normal Volunteers after a  
436 Standard Dose of 500mg Once Daily for 3 Days. Clin Drug Investig 16:161-6.
- 437 38. Clinical and Laboratory Standards Institute. 2018. Performance Standards for  
438 Antimicrobial Susceptibility Testing: Twenty-Eighth Informational Supplement M100.

439 CLSI, Wayne, PA, USA.

440 39. The European Committee on Antimicrobial Susceptibility Testing. 2015.

441 Breakpoint tables for interpretation of MICs and zone diameters. Version 5.0, 2015.

442 [https://www.eucast.org/fileadmin/src/media/PDFs/EUCAST\\_files/Breakpoint\\_tables/](https://www.eucast.org/fileadmin/src/media/PDFs/EUCAST_files/Breakpoint_tables/)

443 [v\\_5.0\\_Breakpoint\\_Table\\_01.pdf](#).

444 40. WHO. 2012. Global Action Plan to Control the Spread and Impact of

445 Antimicrobial Resistance in *Neisseria gonorrhoeae*. Available

446 from:[http://whqlibdoc.who.int/publications/2012/9789241503501\\_eng.pdf?ua=1](http://whqlibdoc.who.int/publications/2012/9789241503501_eng.pdf?ua=1)

447 41. Tapsall, J. W., F. Ndowa, D. A. Lewis, and M. Unemo. 2009. Meeting the public

448 health challenge of multidrug- and extensively drug-resistant *Neisseria gonorrhoeae*.

449 *Expert Rev Anti Infect Ther* 7:821-34.

450

451

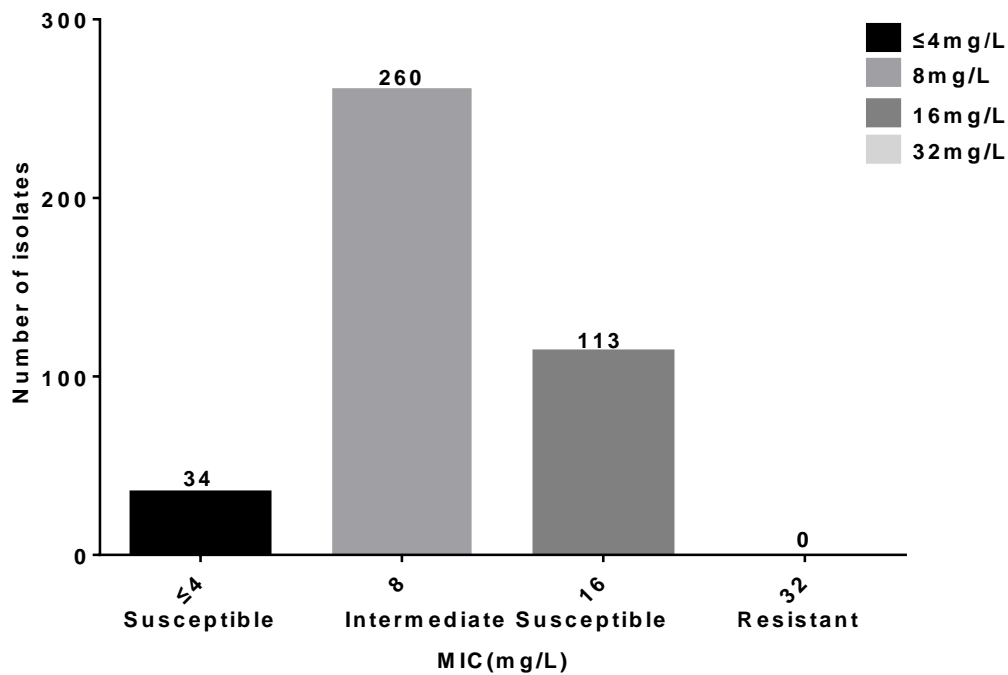

452

453

454 Figure 1. Susceptibility of gentamicin against *N. gonorrhoeae* strains isolated in

455 Nanjing, China, 2016–2017 (n =407).

456

457

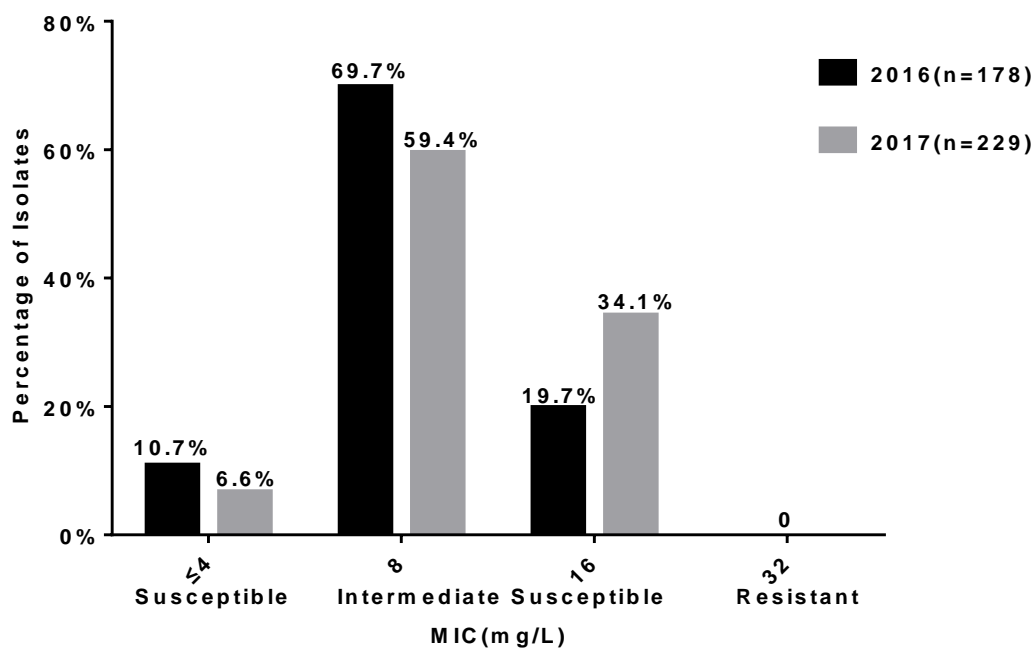

458

459

460 Figure 2. Distributions of MICs of gentamicin against *N. gonorrhoeae* isolates in 2016

461 (n=178) and 2017 (n=229).

462

463

464



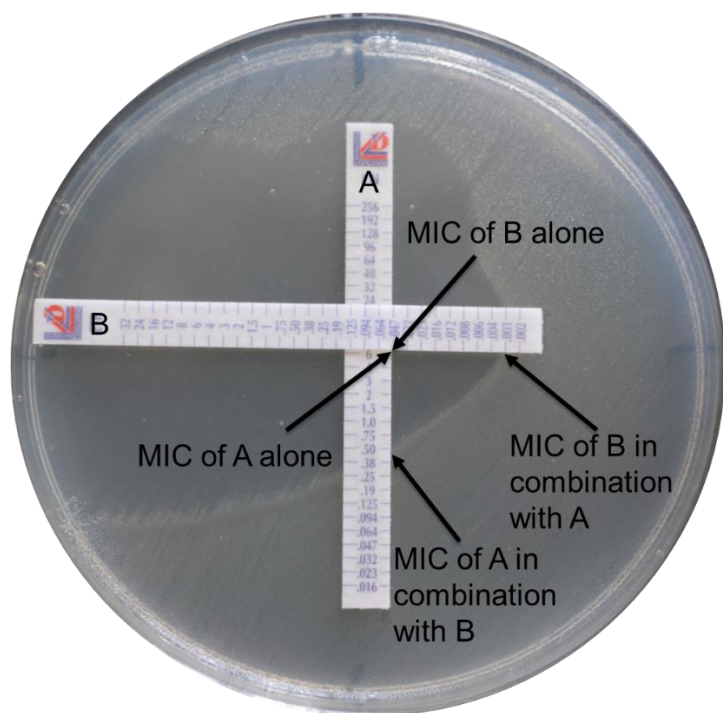

465

466 Figure 3. Photograph of strip placement for E-test synergy method.

467

468

469

470

471

472

473

474

475

476

477

478

479 Table 1. Synergy test results for combinations of gentamicin plus azithromycin,

480 ceftriaxone, ertapenem against 97 MDR *N. gonorrhoeae* isolates

| Effect n (%)           | Antimicrobial combinations |             |             |
|------------------------|----------------------------|-------------|-------------|
|                        | GEN +CRO                   | GEN +ETP    | GEN +AZM    |
| Synergistic n (%)      | 16(16.5%)                  | 27(27.8%)   | 8(8.2%)     |
| Indifferent n (%)      | 81(83.5%)                  | 70(72.2%)   | 89(91.8%)   |
| Antagonistic n (%)     | 0                          | 0           | 0           |
| FICI (geometric mean)  | 0.747                      | 0.662       | 1.021       |
| Classification Overall | Indifferent                | Indifferent | Indifferent |

481 Abbreviations: n, number; GEN, gentamicin; CRO, ceftriaxone; ETP, ertapenem;

482 AZM, azithromycin.

483

484

485

486

487

488

489

490

491

492 Table 2. *In vitro* antibacterial activity of tested antibiotics combinations against 97

493 MDR *N. gonorrhoeae* isolates

| MIC                             | Antimicrobial combinations |                    |                |
|---------------------------------|----------------------------|--------------------|----------------|
|                                 | GEN +CRO                   | GEN +ETP           | GEN +AZM       |
| MIC A <sub>alone</sub>          | 5.840(2-12)                | 5.840(2-12)        | 5.840(2-12)    |
| MIC A <sub>in combination</sub> | 2.217(0.38-6)              | 1.536(0.25-6)      | 2.949(1-8)     |
| MIC B <sub>alone</sub>          | 0.078(0.016-0.75)          | 0.018(0.006-0.064) | 0.347(0.047-8) |
| MIC B <sub>in combination</sub> | 0.026(0.004-0.25)          | 0.007(0.002-0.047) | 0.175(0.023-2) |

494 Abbreviations: GEN, gentamicin; CRO, ceftriaxone; ETP, ertapenem; AZM,

495 azithromycin; MIC, minimum inhibitory concentration.

496

497
